# Supplementary material for: Association of Drinking Herbal Tea with Activities of Daily Living among Elderly: A Latent Class Analysis
Source: MDPI journal article supplement (doi:10.3390/nu15122796), 2023-06-19
Supplement: s1 [file s1]

**Supplementary Table S1.** The probabilities of drinking herbal tea and tea in three-latent-class.

|                                                    | Class 1 | Class 2 | Class 3 |
|----------------------------------------------------|---------|---------|---------|
| <b>Drinking herbal tea</b>                         |         |         |         |
| <b>At aged 60 (2008 survey)</b>                    |         |         |         |
| One almost every day                               | 0.063   | 0.001   | 0.000   |
| Two, not every day, but at least once per week     | 0.640   | 0.000   | 0.000   |
| Three, not every week, but at least once per month | 0.174   | 0.000   | 0.005   |
| Four, not every month, but occasionally            | 0.123   | 0.989   | 0.054   |
| Five rarely or never                               | 0.000   | 0.010   | 0.941   |
| <b>2008 survey</b>                                 |         |         |         |
| One almost every day                               | 0.605   | 0.003   | 0.008   |
| Two, not every day, but at least once per week     | 0.131   | 0.000   | 0.024   |
| Three, not every week, but at least once per month | 0.161   | 0.954   | 0.042   |
| Four, not every month, but occasionally            | 0.104   | 0.042   | 0.079   |
| Five rarely or never                               | 0.000   | 0.001   | 0.847   |
| <b>2011 survey</b>                                 |         |         |         |
| One almost every day                               | 0.654   | 0.001   | 0.071   |
| Two, not every day, but at least once per week     | 0.063   | 0.002   | 0.052   |
| Three, not every week, but at least once per month | 0.080   | 0.011   | 0.068   |
| Four, not every month, but occasionally            | 0.151   | 0.928   | 0.166   |
| Five rarely or never                               | 0.053   | 0.058   | 0.643   |
| <b>2014 survey</b>                                 |         |         |         |
| One almost every day                               | 0.618   | 0.000   | 0.070   |
| Two, not every day, but at least once per week     | 0.103   | 0.003   | 0.060   |
| Three, not every week, but at least once per month | 0.047   | 0.000   | 0.113   |
| Four, not every month, but occasionally            | 0.173   | 0.961   | 0.200   |
| Five rarely or never                               | 0.058   | 0.036   | 0.557   |
| <b>2018 survey</b>                                 |         |         |         |
| One almost every day                               | 0.062   | 0.005   | 0.072   |
| Two, not every day, but at least once per week     | 0.635   | 0.018   | 0.067   |
| Three, not every week, but at least once per month | 0.081   | 0.934   | 0.059   |
| Four, not every month, but occasionally            | 0.147   | 0.032   | 0.140   |
| Five rarely or never                               | 0.075   | 0.010   | 0.663   |
| <b>Drinking Tea</b>                                |         |         |         |
| <b>At aged 60 (2008 survey)</b>                    |         |         |         |
| One almost every day                               | 0.730   | 0.087   | 0.001   |
| Two, not every day, but at least once per week     | 0.095   | 0.155   | 0.013   |
| Three, not every week, but at least once per month | 0.015   | 0.703   | 0.012   |
| Four, not every month, but occasionally            | 0.086   | 0.011   | 0.120   |
| Five rarely or never                               | 0.074   | 0.043   | 0.855   |
| <b>2008 survey</b>                                 |         |         |         |
| One almost every day                               | 0.802   | 0.144   | 0.000   |
| Two, not every day, but at least once per week     | 0.066   | 0.059   | 0.012   |
| Three, not every week, but at least once per month | 0.019   | 0.778   | 0.014   |
| Four, not every month, but occasionally            | 0.059   | 0.010   | 0.107   |
| Five rarely or never                               | 0.055   | 0.009   | 0.867   |

|                                                    |       |       |       |  |
|----------------------------------------------------|-------|-------|-------|--|
| <b>2011 survey</b>                                 |       |       |       |  |
| One almost every day                               | 0.091 | 0.211 | 0.105 |  |
| Two, not every day, but at least once per week     | 0.757 | 0.086 | 0.052 |  |
| Three, not every week, but at least once per month | 0.008 | 0.037 | 0.035 |  |
| Four, not every month, but occasionally            | 0.049 | 0.584 | 0.066 |  |
| Five rarely or never                               | 0.095 | 0.082 | 0.742 |  |
| <b>2014 survey</b>                                 |       |       |       |  |
| One almost every day                               | 0.732 | 0.069 | 0.073 |  |
| Two, not every day, but at least once per week     | 0.102 | 0.089 | 0.037 |  |
| Three, not every week, but at least once per month | 0.021 | 0.744 | 0.028 |  |
| Four, not every month, but occasionally            | 0.040 | 0.056 | 0.054 |  |
| Five rarely or never                               | 0.106 | 0.043 | 0.808 |  |
| <b>2018 survey</b>                                 |       |       |       |  |
| One almost every day                               | 0.100 | 0.041 | 0.049 |  |
| Two, not every day, but at least once per week     | 0.589 | 0.040 | 0.034 |  |
| Three, not every week, but at least once per month | 0.028 | 0.008 | 0.011 |  |
| Four, not every month, but occasionally            | 0.050 | 0.890 | 0.024 |  |
| Five rarely or never                               | 0.233 | 0.021 | 0.883 |  |

Note: Class 1 was defined as a frequently drinking group, Class 2 as an occasionally drinking group, and Class 3 as a rarely drinking group.

**Supplementary Table S2.** Baseline characteristics of the participants by different groups of drinking tea (N(%)).

| Characteristics                         | N(%)        | Frequently | Occasionally | Rarely     | P-Value |
|-----------------------------------------|-------------|------------|--------------|------------|---------|
| Total                                   | 7441(100.0) | 2203(29.6) | 2095(28.2)   | 3143(42.2) |         |
| <b>Sociodemographic characteristics</b> |             |            |              |            |         |
| Age group, years                        |             |            |              |            | <0.001  |
| <80                                     | 3209(43.1)  | 1012(31.5) | 967(30.1)    | 1230(38.3) |         |
| 80-90                                   | 2309(31.0)  | 699(30.3)  | 675(29.2)    | 935(40.5)  |         |
| >=90                                    | 1923(25.8)  | 492(25.6)  | 453(23.6)    | 978(50.9)  |         |
| Gender                                  |             |            |              |            | <0.001  |
| Male                                    | 3485(46.8)  | 1321(37.9) | 1030(29.6)   | 1134(32.5) |         |
| Female                                  | 3956(53.2)  | 882(22.3)  | 1065(26.9)   | 2009(50.8) |         |
| Education Level                         |             |            |              |            | <0.001  |
| Illiteracy                              | 4129(55.5)  | 991(24.0)  | 1131(27.4)   | 2007(48.6) |         |
| Primary School or Below                 | 1887(25.4)  | 673(35.7)  | 538(28.5)    | 676(35.8)  |         |
| Junior High School or Above             | 1425(19.2)  | 539(37.8)  | 426(29.9)    | 460(32.3)  |         |
| Ethnic                                  |             |            |              |            | <0.001  |
| Han                                     | 6964(93.6)  | 2132(30.6) | 2028(29.1)   | 2804(40.3) |         |
| Other                                   | 477(6.4)    | 71(14.9)   | 67(14.1)     | 339(71.1)  |         |
| Residence Area                          |             |            |              |            | <0.001  |
| City                                    | 1178(15.8)  | 413(35.1)  | 336(28.5)    | 429(36.4)  |         |
| Town                                    | 1599(21.5)  | 575(36.0)  | 499(31.2)    | 525(32.8)  |         |
| Rural                                   | 4664(62.7)  | 1215(26.1) | 1260(27.0)   | 2189(46.9) |         |

|                                     |            |            |            |            |        |
|-------------------------------------|------------|------------|------------|------------|--------|
| Co-Residence                        |            |            |            |            | 0.012  |
| With Household                      |            |            |            |            |        |
| Member(S)                           | 6058(81.4) | 1834(30.3) | 1708(28.2) | 2516(41.5) |        |
| Alone or In an                      |            |            |            |            |        |
| Institution                         | 1383(18.6) | 369(26.7)  | 387(28.0)  | 627(45.3)  |        |
| <b>Healthy lifestyle and status</b> |            |            |            |            |        |
| Smoking                             |            |            |            |            | <0.001 |
| Never                               | 4722(63.5) | 1144(24.2) | 1279(27.1) | 2299(48.7) |        |
| Current or Former                   | 2719(36.5) | 1059(39.0) | 816(30.0)  | 844(31.0)  |        |
| Drinking                            |            |            |            |            | <0.001 |
| Never                               | 4941(66.4) | 1275(25.8) | 1316(26.6) | 2350(47.6) |        |
| Current or Former                   | 2500(33.6) | 928(37.1)  | 779(31.2)  | 793(31.7)  |        |
| Drinking herbal tea                 |            |            |            |            | <0.001 |
| Frequently                          | 2203(29.6) | 344(38.4)  | 292(32.6)  | 260(29.0)  |        |
| Occasionally                        | 2095(28.2) | 712(37.3)  | 624(32.7)  | 575(30.1)  |        |
| Rarely                              | 3143(42.2) | 1147(24.8) | 1179(25.4) | 2308(49.8) |        |
| Eat Fresh Fruits                    |            |            |            |            | <0.001 |
| Almost Everyday                     | 2895(38.9) | 1006(34.8) | 830(28.7)  | 1059(36.6) |        |
| Occasionally                        | 2807(37.7) | 779(27.8)  | 787(28.0)  | 1241(44.2) |        |
| Rarely or Never                     | 1739(23.4) | 418(24.0)  | 478(27.5)  | 843(48.5)  |        |
| Eat Fresh Vegetables                |            |            |            |            | <0.001 |
| Almost Everyday                     | 6732(90.5) | 2045(30.4) | 1861(27.6) | 2826(42.0) |        |
| Occasionally or                     |            |            |            |            |        |
| rarely                              | 709(9.5)   | 158(22.3)  | 234(33.0)  | 317(44.7)  |        |
| Exercise                            |            |            |            |            | <0.001 |
| Current                             | 2588(34.8) | 843(32.6)  | 731(28.3)  | 1014(39.2) |        |
| Former                              | 703(9.4)   | 239(34.0)  | 194(27.6)  | 270(38.4)  |        |
| Never                               | 4150(55.8) | 1121(27.0) | 1170(28.2) | 1859(44.8) |        |
| Self-Reported Health                |            |            |            |            | <0.001 |
| Good or Very Good                   | 3831(51.5) | 1239(32.3) | 1084(28.3) | 1508(39.4) |        |
| General or Below                    | 3610(48.5) | 964(26.7)  | 1011(28.0) | 1635(45.3) |        |
| No. of comorbidities                |            |            |            |            | 0.286  |
| 0                                   | 4822(64.8) | 1397(29.0) | 1357(28.1) | 2068(42.9) |        |
| 1                                   | 1944(26.1) | 614(31.6)  | 548(28.2)  | 782(40.2)  |        |
| 2                                   | 530(7.1)   | 147(27.7)  | 149(28.1)  | 234(44.2)  |        |
| 3                                   | 120(1.6)   | 34(28.3)   | 34(28.3)   | 52(43.3)   |        |
| ≥4                                  | 25(0.3)    | 11(44.0)   | 7(28.0)    | 7(28.0)    |        |
